# Supplementary material for: Mobility and biodegradability of an imidazolium based ionic liquid in soil and soil amended with waste sewage sludge
Source: Royal Society of Chemistry journal article supplement (doi:10.1039/c5em00209e), 2015-01-01
Supplement: c5em00209e1.pdf [file c5em00209e1.pdf]

## Electronic supplementary material

### Mobility and biodegradability of an imidazolium based ionic liquid in soil and soil amended with waste sewage sludge

M. Markiewicz, C. Jungnickel, C.-W. Cho, S. Stolte

#### 1. ESI-MS spectrum

Samples were diluted 1:50 with methanol and analyzed by electrospray ionization mass spectrometry equipped with an ion trap detector (Brucker-Daltonic GmbH, Germany). Mass spectra for cations were acquired in the positive ion mode in the scan range of  $m/z^+$  50–400. The ESI source conditions were set according to ref. <sup>29</sup> with a capillary voltage of 2000 V, drying gas flow-rate of 5 L min<sup>-1</sup>, drying gas temperature at 300 °C and nebulizer at 50 psi.

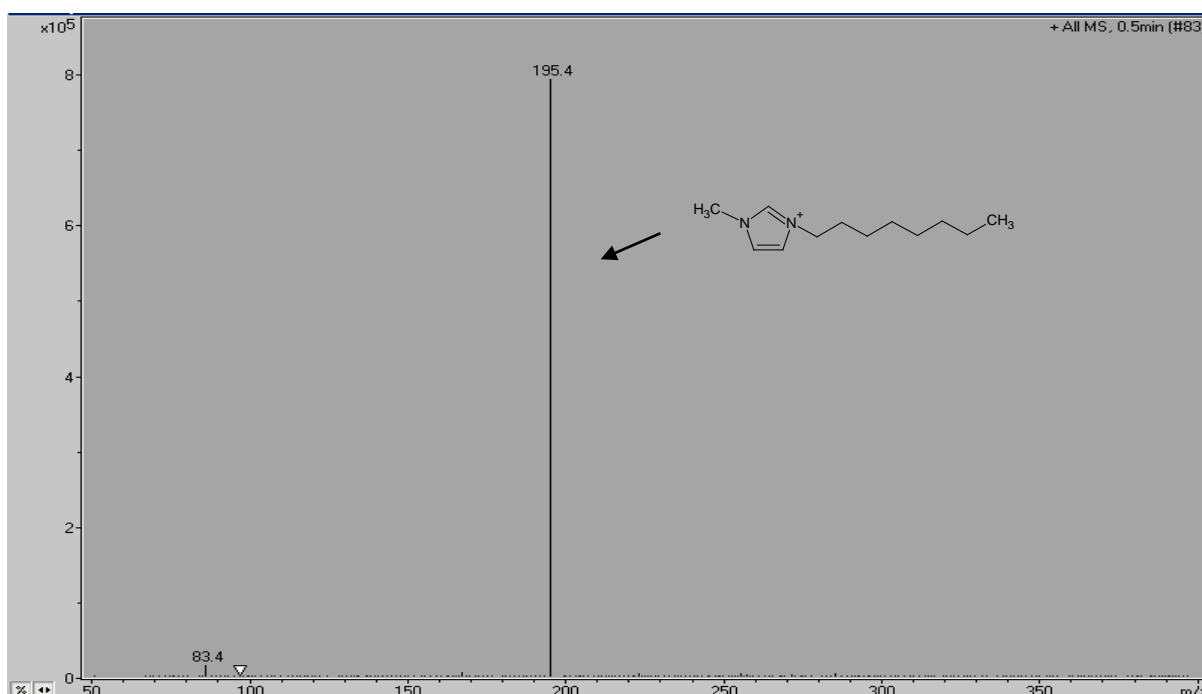

Figure S1 OMIM standard solution 5  $\mu\text{mol L}^{-1}$

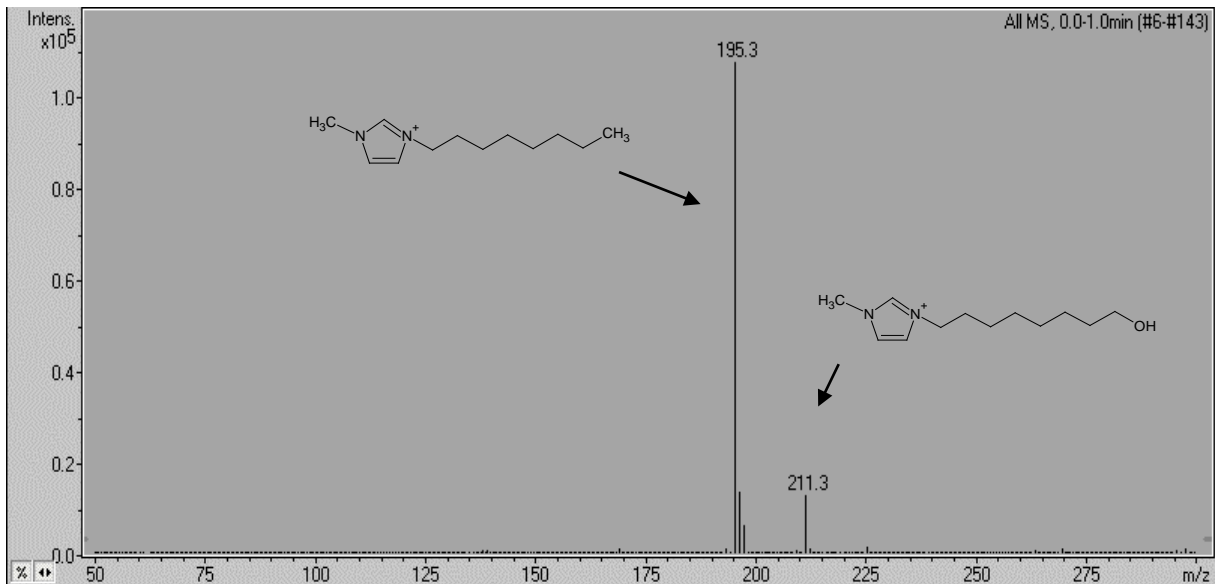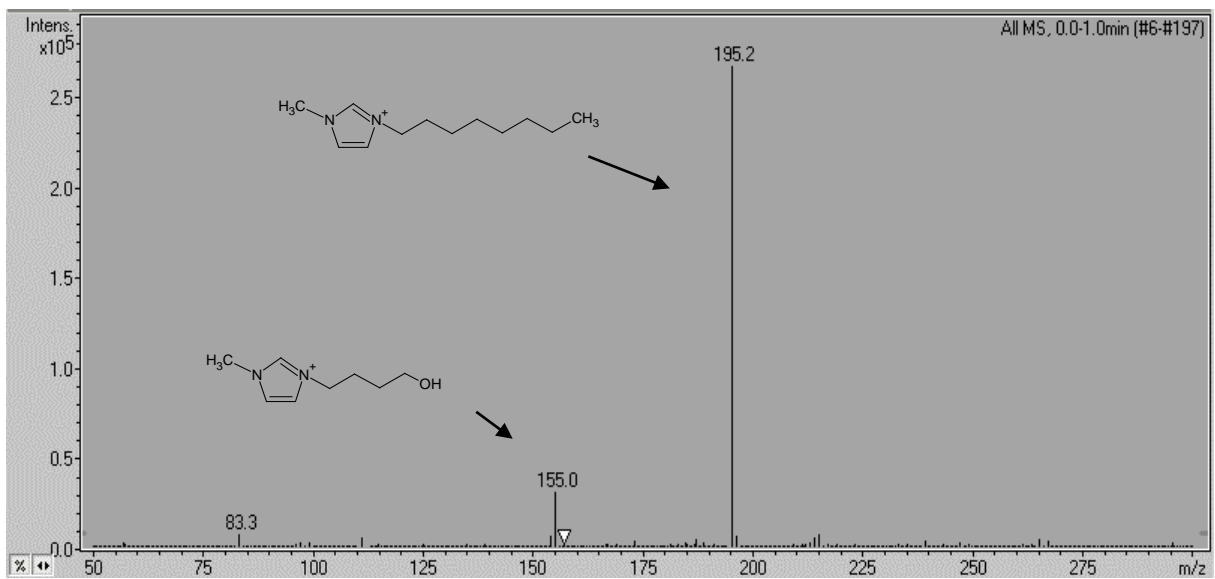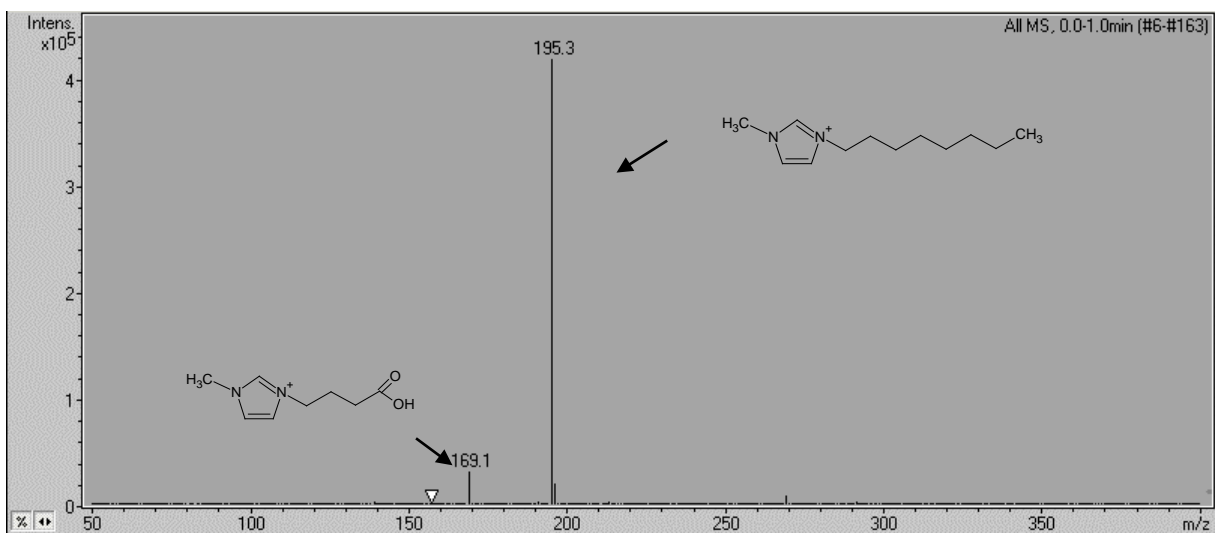

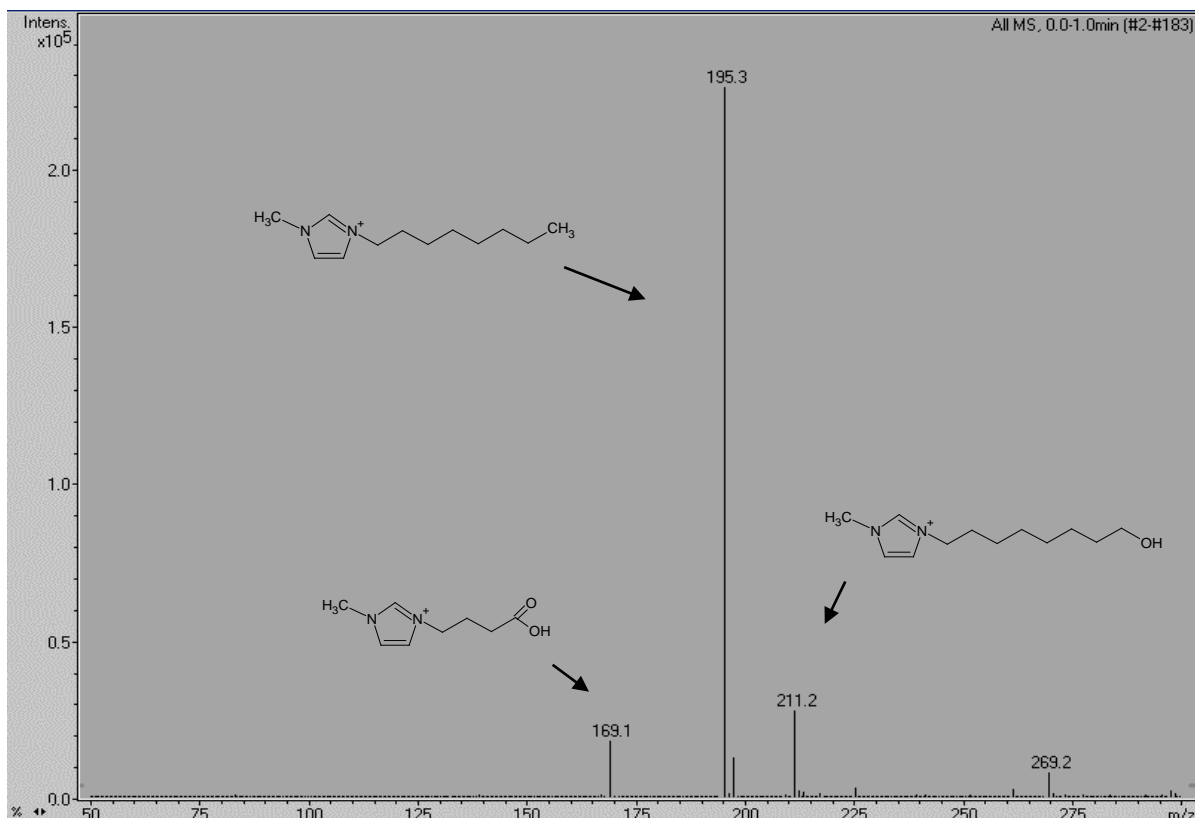

Figure S2. Samples of column effluent with transformation products

## 2. Example of a chromatogram

HPLC/UV VWR Hitachi system containing the L2130 pump, L2130 degasser, L2200 autosampler, L2300 column oven, L2450 diode array detector and the EZChrom Elite software was used for analysis with a cation exchange column (250/3 NUCLEOSIL 100-5 SA) purchased from Macherey-Nagel (Dürren, Germany) was used. The mobile phase consisted of 55% acetonitrile (HPLC grade) and 45% aqueous 20 mM  $\text{KH}_2\text{PO}_4$  / 3.9 mM  $\text{H}_3\text{PO}_4$  buffer. A flow rate of 0.7 mL min<sup>-1</sup>, temperature of 40°C and a detection wavelength of 212 nm were used. Here OMIM Cl sample, approximately 50  $\mu\text{mol L}^{-1}$  is shown.

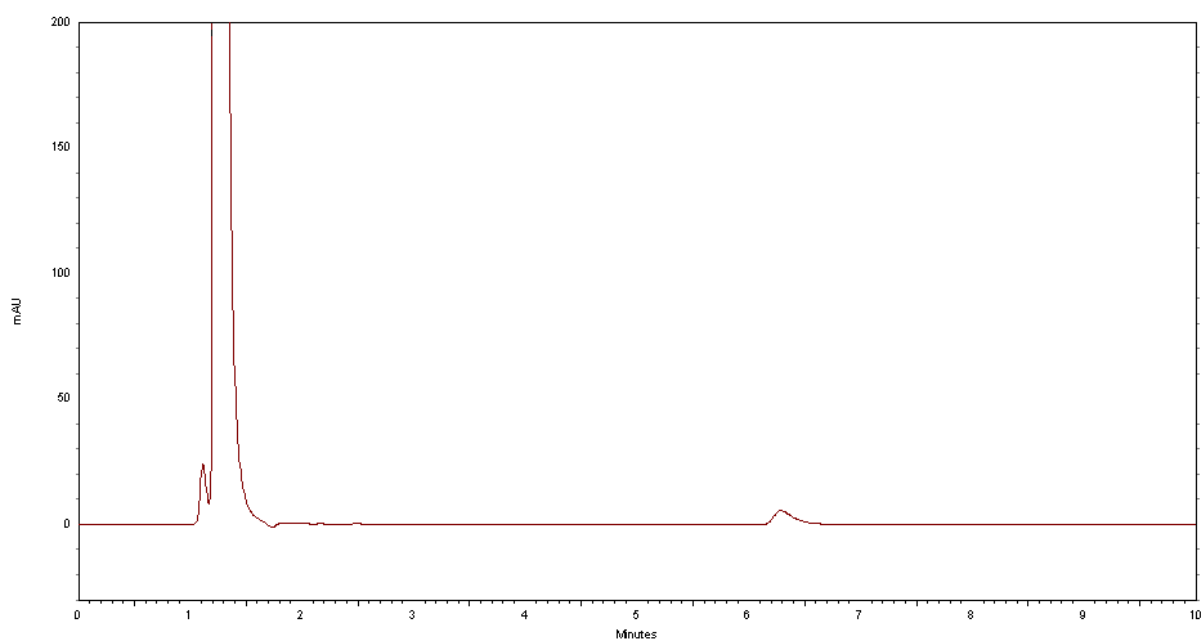

Figure S3. Example of HPLC/UV chromatogram of OMIMCl 50  $\mu\text{mol L}^{-1}$

### 3. Schematic representation of experimental approach

#### Column flushing

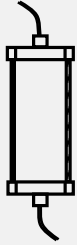

- Breakthrough curves by HPLC/UV
- Transformation products by MS

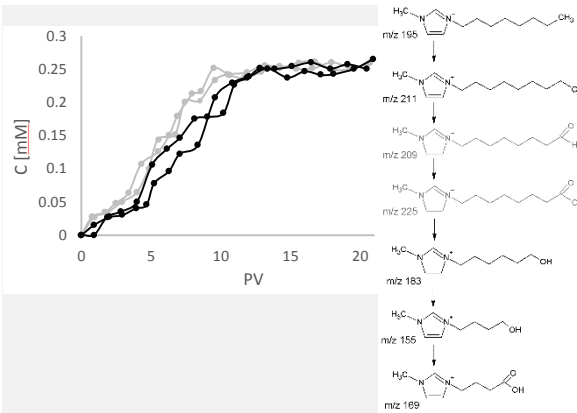

#### Batch sorption tests

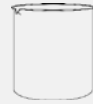

- Sorption isotherms (HPLC/UV)
- Distribution coefficient  $K_D$

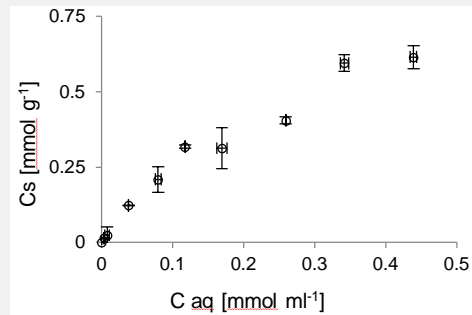

#### Biodegradability test

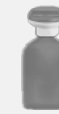

- Biodegradability (manometric respirometry)

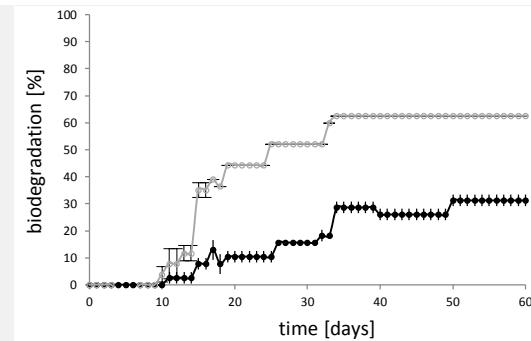

Figure S4. Experimental approach

#### 4. Analysis of statistical significance of Kd values obtained in column test

Table 1. Details of statistical analysis.

|                            | Kd mean | Standard deviation | difference of means | standard error | t-value | p-value |
|----------------------------|---------|--------------------|---------------------|----------------|---------|---------|
| sand ( $k_{D1}$ )          | 1.662   | 0.155              | 0.494               | 0.203          | 2.437   | 0.138   |
| sand + sludge ( $k_{D2}$ ) | 2.157   | 0.242              |                     |                |         |         |
| LUFA ( $k_{D3}$ )          | 1.434   | 0.512              | 1.340               | 0.413          | 3.246   | 0.083   |
| LUFA + sludge ( $k_{D4}$ ) | 2.775   | 0.281              |                     |                |         |         |

The hypothesis testing

$H_0: \mu_{kD1} = \mu_{kD2}$  OR  $\mu_{kD3} = \mu_{kD4}$

$H_a: \mu_{kD1} \neq \mu_{kD2}$  OR  $\mu_{kD3} \neq \mu_{kD4}$

Result : at  $\alpha=0.05$  there is not enough evidence to reject the  $H_0$ .
